# Supplementary material for: Paneth Cells Regulate Lymphangiogenesis under Control of Microbial Signals during Experimental Portal Hypertension
Source: MDPI journal article supplement (doi:10.3390/biomedicines10071503), 2022-06-25
Supplement: s1 [file s1]

**Title:**

Paneth cells regulate lymphangiogenesis under control of microbial signals during experimental portal hypertension.

**Authors:**

Mohsin Hassan <sup>1,2,†</sup>, Oriol Juanola <sup>3,4,†</sup>, Irene Keller <sup>5</sup>, Paolo Nanni <sup>6</sup>, Witold Wolski <sup>6</sup>, Sebastián Martínez-López <sup>7,8</sup>, Esther Caparrós <sup>7,8</sup>, Rubén Francés <sup>7,8,9,10</sup> and Sheida Moghadamrad <sup>2,3,4,11,\*</sup>

**Affiliations:**

<sup>1</sup> Department of Hepatology & Gastroenterology, Charité Universitätsmedizin Berlin, 13353 Berlin, Germany; mohsin.hassan@charite.de (M.H.)

<sup>2</sup> Department for Biomedical Research (DBMR), University of Bern, University Clinic of Visceral Surgery and Medicine, Inselspital, Bern, Switzerland, 3008 Bern, Switzerland

<sup>3</sup> Laboratories for Translational Research, Department of Gastroenterology and Hepatology, Ente Ospedaliero Cantonale, 6500 Bellinzona, Switzerland; oriol.juanolajuarez@eoc.ch (O.J); sheida.moghadamrad@usi.ch (S.M)

<sup>4</sup> Faculty of Biomedical Sciences, Università della Svizzera Italiana, 6900 Lugano, Switzerland

<sup>5</sup> Interfaculty Bioinformatics Unit, Swiss Institute of Bioinformatics, University of Bern, 3008 Bern, Switzerland; i.keller@nexus.ethz.ch (I.K.)

<sup>6</sup> Functional Genomics Center Zurich, University/ETH Zurich, 8057 Zurich, Switzerland; paolo.nanni@fgcz.uzh.ch (P.N.); wew.fgcz@gmail.com (W.W.)

<sup>7</sup> Hepatic and Intestinal Immunobiology Group, Departamento Medicina Clínica,  
Universidad Miguel Hernández, 03550 Alicante, Spain;

sebastian.martinez@goumh.umh.es (S.M.-L.);

ecaparro@umh.es (E.C.); rfrances@umh.es (R.F.)

<sup>8</sup> Instituto de Investigación Sanitaria ISABIAL, Hospital General Universitario, 03010  
Alicante, Spain

<sup>9</sup> Instituto de Investigación, Desarrollo e Innovación en Biotecnología Sanitaria de  
Elche (IDiBE),

Universidad Miguel Hernández, 03207 Elche, Spain

<sup>10</sup> CIBERehd, Instituto Salud Carlos III, 28029 Madrid, Spain

<sup>11</sup> Department of Hepatology, University Clinic of Visceral Surgery and Medicine,  
Inselspital, 3008 Bern, Switzerland

\* Correspondence: sheida.moghadamrad@usi.ch; Tel.: +41-58-666-7117

† These authors contributed equally to this work.

### **Correspondence:**

Dr.phil.nat. Sheida Moghadamrad

Translational Research Laboratory, Department of Gastroenterology and Hepatology, Ente  
Ospedaliero Cantonale, Lugano, Switzerland;

Università della Svizzera Italiana, Faculty of Biomedical Sciences, Lugano,  
Switzerland,

Hepatology Laboratory Research, Bellinzona Institutes of Science,

Ente Ospedaliero Cantonale, Via F. Chiesa 5, 6500 Bellinzona, Switzerland

Phone: +41 91 8210070

E-mail: sheida.moghadamrad@usi.ch

## Supplementary Figure S1

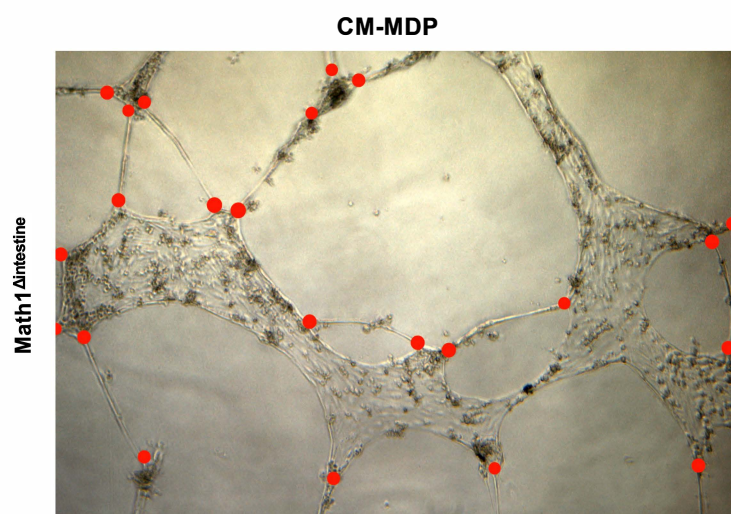

**Supplementary Figure S1. Manual quantitation of tubularization.** Clearly defined tube nodes were counted manually on each micrograph.

Supplementary Figure S2

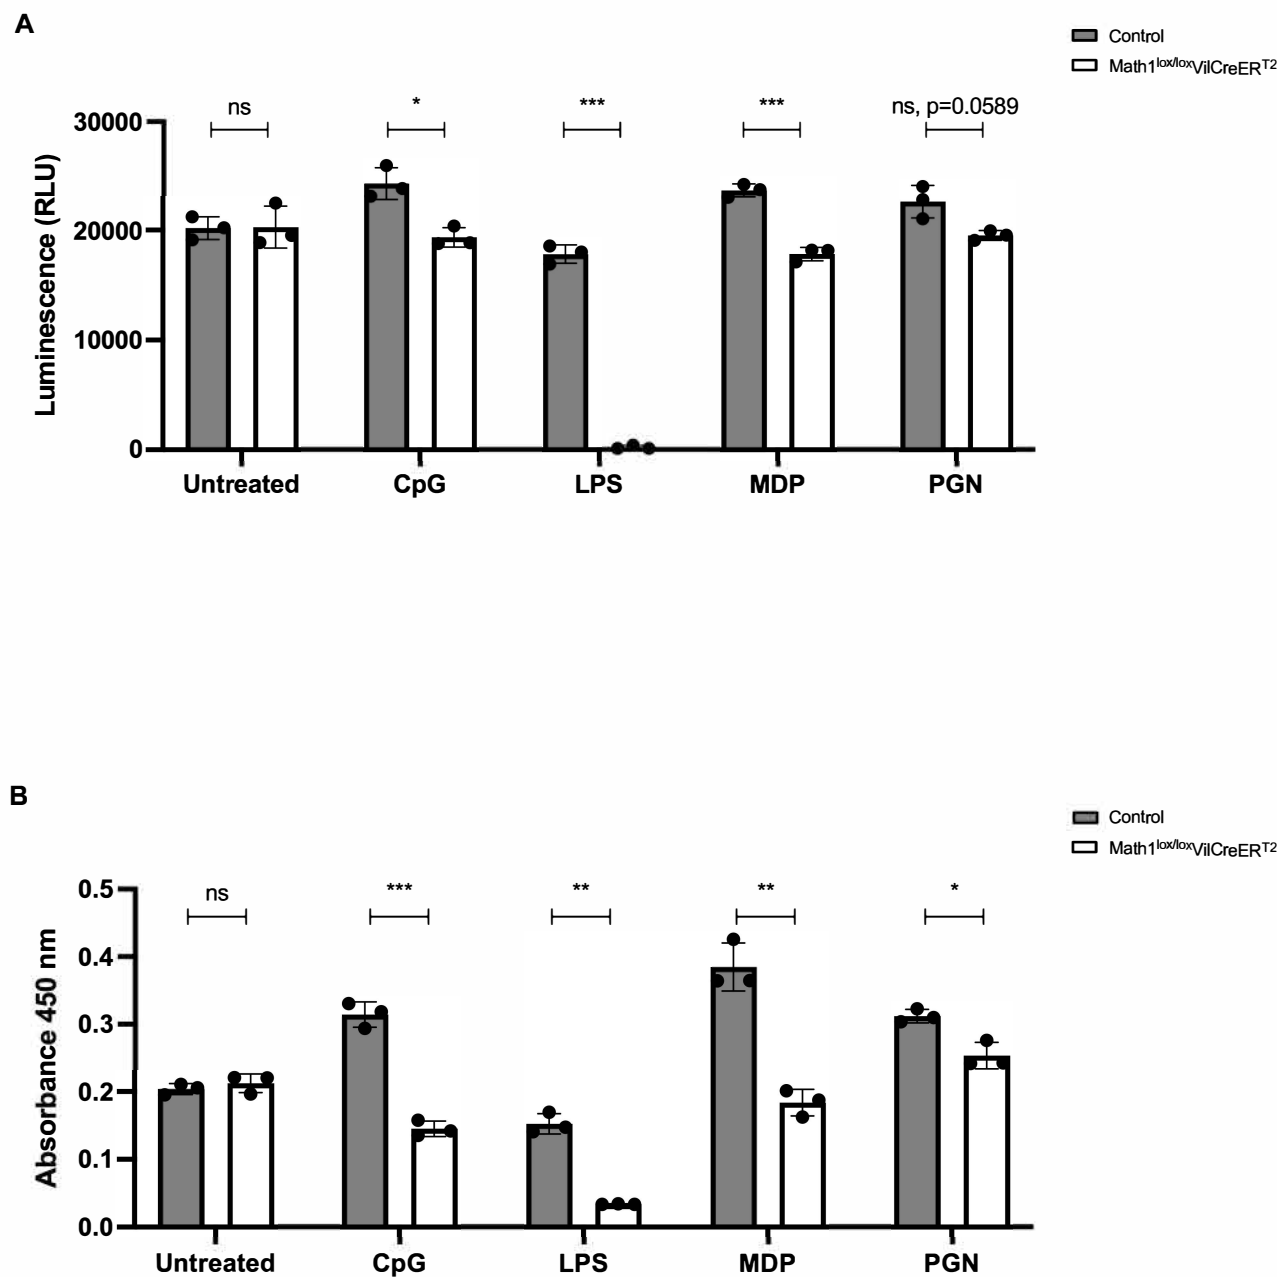

**Supplementary Figure S2. LECs proliferation after treatment with organoids CM.** (A) CellTiter-Glo® assay using  $2 \times 10^3$  LECs incubated with organoids CM for 12h. (B) CCK-8 assay using  $2 \times 10^3$  LECs

incubated with organoids CM for 12h. Abbreviations: CM, Conditioned media; CpG, CpG motifs of bacterial DNA; LECs, Lymphatic endothelial cells; LPS, Lipopolysaccharide; Math1<sup>lox/lox</sup>VilCreER<sup>T2</sup>, Paneth cell depleted; MDP, Muramyl di-peptide; ns, not significant; PGN, peptidoglycan; PCs, Paneth cells. Data are expressed as mean  $\pm$  SD and is representative of 3 independent experiments. \*p < 0.05; \*\*p < 0.005; \*\*\*p < 0.001.

## **Supplementary materials and methods**

### **Sample preparation for proteomics**

For each sample the protein concentration was estimated using the Qubit® Protein Assay Kit (Life Technologies, Zurich, Switzerland). The samples were then prepared by using a commercial iST Kit (PreOmics, Germany) with an updated version of the protocol. Briefly, 50µg of protein were solubilized in 'Lyse' buffer, boiled at 95°C for 10 minutes and processed with HIFU for 30seconds setting the ultrasonic amplitude to 85%. Afterwards, the samples were transferred to the cartridge and digested by adding 50µl of the 'Digest' solution. After 60minutes of incubation at 37°C the digestion was stopped with 100µl of Stop solution. The solutions in the cartridge were removed by centrifugation at 3800g, while the peptides were retained by the iST-filter. Finally, the peptides were washed, eluted, dried and re-solubilized in 40 µL of buffer (3% acetonitrile, 0.1% formic acid) for LC-MS-Analysis. IRT retention time standard peptides (Biognosys, Switzerland) were added to each sample as of manufacturer instructions.

### **Liquid chromatography-mass spectrometry analysis**

Mass spectrometry analysis was performed on a QExactive HF-X mass spectrometer (Thermo Scientific) equipped with a Digital PicoView source (New Objective) and coupled to a M-Class UPLC (Waters). Solvent composition at the two channels was 0.1% formic acid for channel A and 0.1% formic acid, 99.9% acetonitrile for channel B. For each sample 2µL of peptides were loaded on a commercial MZ Symmetry C18 Trap Column (100Å, 5 µm, 180 µm x 20 mm, Waters) followed by nanoEase MZ C18 HSS T3 Column (100Å, 1.8 µm, 75 µm x 250 mm, Waters). The peptides were eluted

at a flow rate of 300 nL/min by a gradient from 8 to 27% B in 82 min, 35% B in 5 min and 80% B in 1 min. Samples were acquired in a randomized order. The mass spectrometer was operated in data-dependent mode (DDA), acquiring a full-scan MS spectrum (350–1'400 m/z) at a resolution of 120'000 at 200 m/z after accumulation to a target value of 3'000'000, followed by HCD (higher-energy collision dissociation) fragmentation on the twenty most intense signals per cycle. HCD spectra were acquired at a resolution of 15'000 using a normalized collision energy of 28 and a maximum injection time of 22ms. The automatic gain control (AGC) was set to 100'000 ions. Charge state screening was enabled. Singly, unassigned, and charge states higher than seven were rejected. Only precursors with intensity above 110'000 were selected for MS/MS. Precursor masses previously selected for MS/MS measurement were excluded from further selection for 30 s, and the exclusion window was set at 10 ppm. The samples were acquired using internal lock mass calibration on m/z 371.1012 and 445.1200.

The mass spectrometry proteomics data were handled using the local laboratory information management system (LIMS).

### **Protein identification and label free protein quantification**

The acquired raw MS data were processed by MaxQuant (version 1.6.2.3), followed by protein identification using the integrated Andromeda search engine. Spectra were searched against a Uniprot mouse reference proteome (taxonomy 10090, canonical version from 2016-09-02), concatenated to its reversed decoyed fasta database and common protein contaminants. Carbamidomethylation of cysteine was set as fixed modification, while methionine oxidation and N-terminal protein acetylation were set

as variable. Enzyme specificity was set to trypsin/P allowing a minimal peptide length of 7 amino acids and a maximum of two missed-cleavages. MaxQuant Orbitrap default search settings were used. The maximum false discovery rate (FDR) was set to 0.01 for peptides and 0.05 for proteins. Label free quantification was enabled and a 2 minutes window for match between runs was applied. In the MaxQuant experimental design template, each file is kept separate in the experimental design to obtain individual quantitative values. Protein fold changes were computed based on Intensity values reported in the proteinGroups.txt file. A set of functions implemented in the R package SRMSERVICE was used to filter for proteins with 2 or more peptides allowing for a maximum of 4 missing values, and to normalize the data with a modified robust z-score transformation and to compute p-values using the t-test with pooled variance. If all measurements of a protein are missing in one of the conditions, a pseudo fold change was computed replacing the missing group average by the mean of 10% smallest protein intensities in that condition.

### **Cell proliferation assay**

LECs at passage 8 were serum and growth factors starved overnight. A total of  $2 \times 10^3$ /well LECs were cultured in a 96-well plate and incubated with organoids CM in a total volume of 100  $\mu$ L for 12 hours at 37°C, 5% CO<sub>2</sub>. Cell proliferative capacity of LECs was measured by two methods: CellTiter-Glo® (Promega) and Cell counting Kit-8 (Dojindo) in independent experiments. In the first, 100  $\mu$ L of CellTiter-Glo® reagent was added to the wells and the 96-well plate was incubated for 2 minutes in an orbital shaker to induce cell lysis. Luminiscence was then recorded in the Infinite M Plex plate reader (Tecan). In the second assay, 10  $\mu$ L of CCK-8 solution were added to each

experimental well and the plate was incubated for 4 hours in the incubator at 37°C, 5% CO<sub>2</sub>. Then, absorbance at 450 nm was measured using the Infinite M Plex plate reader (Tecan) using a wavelength correction at 600 nm. In both experiments we included control wells containing medium without cells to obtain values for background luminescence and absorbance.

**Supplementary table S1:** Primers used for genotyping of Math1<sup>Lox/Lox</sup>VilCreER<sup>T2</sup> mice.

| S.No. | Primer      | Sequence                    |
|-------|-------------|-----------------------------|
| 1     | Cre-F       | 5'-CCTGGAAAATGCTTCTGTCCG-3' |
| 2     | Cre-R       | 5'-CAGGGTGTTATAAGCAATCCC-3' |
| 3     | Math1Lox-F  | 5'-CAGATCCCACAGAAGTGACG-3'  |
| 4     | Math1Lox-R- | 5'-ACACTGCTGGACACACTTGG-3'  |

**Supplementary table S2:** Details of probes used for TaqMan® gene expression assays.

| S.No. | Reagent | Dilution | Source                  | Identifier    |
|-------|---------|----------|-------------------------|---------------|
| 1     | FOXC-2  | 1:20     | ThermoFisher Scientific | Mm00546194_s1 |
| 2     | PROX-1  | 1:20     | ThermoFisher Scientific | Mm00435969_m1 |
| 3     | VEGFR2  | 1:20     | ThermoFisher Scientific | Mm01222421_m1 |
| 4     | VEGFR3  | 1:20     | ThermoFisher Scientific | Mm01292604_m1 |



**Supplementary table S3:** Proteins identified in secretome analysis of CM collected from organoids treated with LPS and MDP (Math1<sup>Δint</sup> vs control).

| LPS-treated organoids (Control vs Math1 <sup>Δint</sup> ) |              |                |                      |
|-----------------------------------------------------------|--------------|----------------|----------------------|
| Protein_ID                                                | Protein name | log2FoldChange | Adj. <i>p</i> -value |
| Q06890                                                    | CLUS         | -3,066         | 0,001                |
| Q8R0I0                                                    | ACE2         | 3,261          | 0,002                |
| P84244                                                    | H33          | -1,627         | 0,004                |
| Q9R1P1                                                    | PSB3         | 1,346          | 0,004                |
| Q9DCD0                                                    | 6PGD         | -1,553         | 0,006                |
| O88968                                                    | TCO2         | 2,254          | 0,006                |
| P62806                                                    | H4           | -1,390         | 0,006                |
| O35658                                                    | C1QBP        | 1,298          | 0,006                |
| Q9R1P3                                                    | PSB2         | 1,031          | 0,007                |
| P43137                                                    | LIT1         | 1,950          | 0,007                |
| P24549                                                    | AL1A1        | -1,119         | 0,008                |
| Q07797                                                    | LG3BP        | 1,065          | 0,008                |
| P16110                                                    | LEG3         | -1,953         | 0,008                |
| Q922R8                                                    | PDIA6        | 1,557          | 0,008                |
| P16014                                                    | SCG1         | 1,874          | 0,011                |
| P48758                                                    | CBR1         | -1,223         | 0,012                |
| P10493                                                    | NID1         | -2,004         | 0,012                |
| Q02257                                                    | PLAK         | -1,854         | 0,012                |
| P19137                                                    | LAMA1        | -2,096         | 0,012                |
| P14869                                                    | RLA0         | -1,118         | 0,012                |
| Q8K0C5                                                    | ZG16         | 1,244          | 0,012                |
| Q8K0C9                                                    | GMDS         | -2,371         | 0,013                |
| P02469                                                    | LAMB1        | -2,010         | 0,013                |
| P16858                                                    | G3P          | -1,163         | 0,013                |
| Q9EQF5                                                    | DPYS         | -1,116         | 0,013                |
| O88569                                                    | ROA2         | -0,989         | 0,013                |
| P10126                                                    | EF1A1        | -0,971         | 0,013                |
| P02468                                                    | LAMC1        | -1,966         | 0,013                |
| P29391                                                    | FRIL1        | 0,912          | 0,013                |
| Q02819                                                    | NUCB1        | 0,847          | 0,014                |
| Q9R1P0                                                    | PSA4         | 1,267          | 0,014                |
| Q9QXD6                                                    | F16P1        | 3,050          | 0,014                |
| Q9CZU6                                                    | CISY         | -1,141         | 0,015                |
| P15864                                                    | H12          | -1,518         | 0,015                |
| P63038                                                    | CH60         | 0,859          | 0,016                |
| P09411                                                    | PGK1         | -0,747         | 0,020                |

|                 |                 |        |       |
|-----------------|-----------------|--------|-------|
| Q8BK48          | EST2E           | 0,911  | 0,020 |
| ZZ_FGCZCont0050 | ZZ_FGCZCont0050 | -1,028 | 0,021 |
| O35945          | AL1A7           | -0,968 | 0,021 |
| O08749          | DLDH            | 1,718  | 0,021 |
| P63017          | HSP7C           | -0,788 | 0,022 |
| Q80W65          | PCSK9           | 0,947  | 0,022 |
| Q3UZZ4          | OLFM4           | -1,056 | 0,022 |
| P68373          | TBA1C           | -2,636 | 0,024 |
| P52480          | KPYM            | -0,834 | 0,024 |
| Q9Z2U1          | PSA5            | 1,328  | 0,024 |
| P63260          | ACTG            | -0,817 | 0,026 |
| O09131          | GSTO1           | -0,777 | 0,026 |
| P68510          | 1433F           | -0,717 | 0,026 |
| Q8VC30          | TKFC            | -1,351 | 0,027 |
| P32020          | NLTP            | 1,333  | 0,027 |
| P24822          | PPBI            | -0,683 | 0,027 |
| P13745          | GSTA1           | -0,685 | 0,029 |
| P97449          | AMPN            | 0,832  | 0,029 |
| Q9CQI6          | COTL1           | 2,067  | 0,029 |
| P38647          | GRP75           | 0,882  | 0,029 |
| P16546          | SPTN1           | 1,533  | 0,029 |
| P01898          | HA10            | 2,291  | 0,029 |
| P06728          | APOA4           | 0,838  | 0,030 |
| Q80XD8          | PRAP1           | 0,660  | 0,032 |
| O09051          | GUC2B           | 2,274  | 0,033 |
| P12710          | FABPL           | -0,697 | 0,034 |
| O08585          | CLCA            | 1,462  | 0,035 |
| P68372          | TBB4B           | -1,616 | 0,035 |
| Q00623          | APOA1           | 0,935  | 0,037 |
| P09671          | SODM            | 1,043  | 0,037 |
| P19639          | GSTM4           | -1,924 | 0,040 |
| P23492          | PNPH            | 2,156  | 0,042 |
| P11499          | HS90B           | -0,837 | 0,045 |
| P35979          | RL12            | -1,253 | 0,045 |
| P00329          | ADH1            | -0,671 | 0,047 |
| Q91WU0          | CES1F           | -1,669 | 0,049 |
| P30275          | KCRU            | -0,973 | 0,055 |
| P10649          | GSTM1           | -0,581 | 0,055 |
| Q05793          | PGBM            | -1,043 | 0,055 |
| P19157          | GSTP1           | -0,996 | 0,057 |
| Q8CGP6          | H2A1H           | -0,634 | 0,057 |
| Q9D8N0          | EF1G            | -1,546 | 0,057 |

|        |       |        |       |
|--------|-------|--------|-------|
| P24270 | CATA  | -0,730 | 0,057 |
| P17742 | PPIA  | -0,623 | 0,057 |
| O88322 | NID2  | -1,663 | 0,057 |
| P10605 | CATB  | 1,159  | 0,057 |
| P47738 | ALDH2 | -1,063 | 0,062 |
| P09405 | NUCL  | -1,253 | 0,063 |
| P97429 | ANXA4 | 0,644  | 0,064 |
| Q99PT1 | GDIR1 | 1,515  | 0,065 |
| P00493 | HPRT  | 1,648  | 0,066 |
| A2ASS6 | TITIN | -1,476 | 0,070 |
| Q8K157 | GALM  | 0,756  | 0,077 |
| P99026 | PSB4  | 0,827  | 0,081 |
| P07356 | ANXA2 | 0,585  | 0,083 |
| O70570 | PIGR  | 0,536  | 0,084 |
| Q9D6J6 | NDUV2 | 0,512  | 0,090 |
| Q64133 | AOFA  | 0,904  | 0,094 |
| P53657 | KPYR  | -1,309 | 0,094 |
| P20029 | GRP78 | 0,477  | 0,096 |
| Q61171 | PRDX2 | 0,494  | 0,098 |
| Q9Z2U0 | PSA7  | 0,636  | 0,098 |
| Q99KP3 | CRYL1 | 1,002  | 0,098 |
| Q6ZWM4 | LSM8  | 0,706  | 0,099 |
| Q9WTP6 | KAD2  | 1,178  | 0,099 |
| O70435 | PSA3  | 0,599  | 0,100 |
| Q99LX0 | PARK7 | 0,768  | 0,100 |
| Q9WUM4 | COR1C | 0,999  | 0,100 |
| Q9D312 | K1C20 | 0,846  | 0,102 |
| P50247 | SAHH  | -0,563 | 0,109 |
| P47754 | CAZA2 | -1,002 | 0,114 |
| Q9EQK5 | MVP   | -0,891 | 0,117 |
| Q6URW6 | MYH14 | 0,792  | 0,127 |
| P14206 | RSSA  | -1,418 | 0,132 |
| P58252 | EF2   | -0,540 | 0,137 |
| Q9R0P3 | ESTD  | -1,269 | 0,149 |
| P17563 | SBP1  | -0,501 | 0,149 |
| P11725 | OTC   | 0,789  | 0,155 |
| Q9QXT0 | CNPY2 | 0,882  | 0,155 |
| P05201 | AATC  | 2,112  | 0,166 |
| Q60864 | STIP1 | -0,615 | 0,166 |
| P84089 | ERH   | -0,819 | 0,168 |
| P62962 | PROF1 | -0,476 | 0,168 |
| Q60605 | MYL6  | 0,488  | 0,171 |

|        |       |        |       |
|--------|-------|--------|-------|
| Q91YR9 | PTGR1 | 0,620  | 0,171 |
| P62827 | RAN   | -1,061 | 0,176 |
| O88342 | WDR1  | -0,787 | 0,176 |
| P40142 | TKT   | -0,462 | 0,176 |
| Q9CZ44 | NSF1C | 0,605  | 0,176 |
| P49722 | PSA2  | 0,537  | 0,184 |
| Q9R100 | CAD17 | -0,541 | 0,194 |
| Q8K354 | CBR3  | -0,498 | 0,199 |
| Q62433 | NDRG1 | -0,517 | 0,203 |
| Q9CQV8 | 1433B | -1,199 | 0,205 |
| P05784 | K1C18 | -0,411 | 0,208 |
| P27773 | PDIA3 | 0,356  | 0,211 |
| P68134 | ACTS  | -1,020 | 0,211 |
| Q8R1G2 | CMBL  | 0,714  | 0,211 |
| Q9EPB4 | ASC   | 0,486  | 0,214 |
| Q8CAQ8 | MIC60 | 0,843  | 0,215 |
| P18760 | COF1  | -0,399 | 0,216 |
| Q8K0E8 | FIBB  | -2,558 | 0,227 |
| Q920E5 | FPPS  | -0,374 | 0,227 |
| Q9D1A2 | CNDP2 | 0,863  | 0,227 |
| Q60692 | PSB6  | 0,981  | 0,227 |
| Q9JLJ2 | AL9A1 | -0,758 | 0,227 |
| P08003 | PDIA4 | 1,133  | 0,230 |
| P55050 | FABPI | 0,556  | 0,247 |
| P13707 | GPDA  | -0,445 | 0,252 |
| P70168 | IMB1  | -0,387 | 0,252 |
| P35700 | PRDX1 | 0,372  | 0,253 |
| P08228 | SODC  | 0,387  | 0,253 |
| P01887 | B2MG  | 0,602  | 0,253 |
| P56395 | CYB5  | -0,553 | 0,254 |
| Q9D154 | ILEUA | 0,707  | 0,254 |
| P63242 | IF5A1 | -0,718 | 0,255 |
| Q61508 | ECM1  | -0,524 | 0,255 |
| P62204 | CALM  | 0,524  | 0,255 |
| O88310 | ITL1A | -0,461 | 0,257 |
| O88312 | AGR2  | -0,323 | 0,257 |
| Q9R097 | SPIT1 | 0,874  | 0,257 |
| P68037 | UB2L3 | 0,525  | 0,266 |
| Q8C196 | CPSM  | 0,288  | 0,277 |
| Q9R0P5 | DEST  | -0,337 | 0,283 |
| P39061 | COIA1 | -1,045 | 0,289 |
| P19467 | MUC13 | 0,307  | 0,296 |

|        |       |        |       |
|--------|-------|--------|-------|
| Q0VG18 | SIM24 | 0,926  | 0,305 |
| P97371 | PSME1 | 0,356  | 0,309 |
| P40124 | CAP1  | -0,646 | 0,316 |
| Q62468 | VILI  | -0,512 | 0,316 |
| Q91WG0 | EST2C | -0,391 | 0,316 |
| Q04447 | KCRB  | -0,315 | 0,316 |
| Q8K2B3 | SDHA  | -0,946 | 0,323 |
| P05202 | AATM  | -0,664 | 0,323 |
| Q8C115 | PKHH2 | -0,431 | 0,323 |
| P99029 | PRDX5 | 0,649  | 0,323 |
| Q60997 | DMBT1 | 0,366  | 0,323 |
| P09528 | FRIH  | 0,559  | 0,324 |
| P20108 | PRDX3 | 0,718  | 0,330 |
| O89079 | COPE  | -0,335 | 0,333 |
| P34884 | MIF   | -0,652 | 0,333 |
| Q61425 | HCDH  | 0,636  | 0,333 |
| P51855 | GSHB  | 0,898  | 0,333 |
| Q8K419 | LEG4  | -0,280 | 0,335 |
| P21107 | TPM3  | 1,110  | 0,349 |
| Q08652 | RET2  | -0,568 | 0,352 |
| Q08879 | FBLN1 | -0,335 | 0,352 |
| Q9WVA4 | TAGL2 | 0,322  | 0,352 |
| P97807 | FUMH  | 0,698  | 0,352 |
| P24527 | LKHA4 | -0,440 | 0,352 |
| Q9Z0S1 | BPNT1 | 0,303  | 0,356 |
| E9Q557 | DESP  | -0,973 | 0,362 |
| O70475 | UGDH  | -1,500 | 0,369 |
| Q61937 | NPM   | -0,418 | 0,369 |
| P17751 | TPIS  | -0,361 | 0,370 |
| Q91Y97 | ALDOB | -0,275 | 0,377 |
| P26040 | EZRI  | 0,279  | 0,377 |
| Q8R0W0 | EPIPL | 0,475  | 0,377 |
| Q8VDN2 | AT1A1 | -0,587 | 0,386 |
| P24472 | GSTA4 | -0,315 | 0,389 |
| P17182 | ENOA  | -0,307 | 0,389 |
| Q9CQW5 | LEG2  | -0,223 | 0,389 |
| Q91YR1 | TWF1  | 0,691  | 0,389 |
| P60843 | IF4A1 | -1,017 | 0,402 |
| Q6P069 | SORCN | -0,386 | 0,407 |
| Q62393 | TPD52 | -0,730 | 0,411 |
| Q8R0F8 | FAHD1 | 1,208  | 0,417 |
| P99027 | RLA2  | -0,557 | 0,417 |

|        |       |        |       |
|--------|-------|--------|-------|
| P12023 | A4    | -0,388 | 0,417 |
| O35459 | ECH1  | 0,944  | 0,417 |
| Q7TPR4 | ACTN1 | -2,176 | 0,430 |
| P08122 | CO4A2 | -2,008 | 0,458 |
| Q9QYX7 | PCLO  | -2,430 | 0,463 |
| P16406 | AMPE  | 0,257  | 0,464 |
| P56480 | ATPB  | -0,322 | 0,471 |
| P05064 | ALDOA | -0,226 | 0,472 |
| Q91X72 | HEMO  | -0,312 | 0,474 |
| P08113 | ENPL  | -0,351 | 0,488 |
| Q80X90 | FLNB  | 0,319  | 0,502 |
| P54071 | IDHP  | -0,576 | 0,521 |
| Q61792 | LASP1 | -0,553 | 0,547 |
| P49312 | ROA1  | -0,265 | 0,547 |
| P14152 | MDHC  | -0,204 | 0,561 |
| Q9QUM9 | PSA6  | 0,180  | 0,561 |
| P70441 | NHRF1 | 0,323  | 0,561 |
| P97816 | S100G | -0,487 | 0,576 |
| P06745 | G6PI  | -0,207 | 0,576 |
| P17897 | LYZ1  | -0,244 | 0,577 |
| P24369 | PPIB  | -0,410 | 0,591 |
| P59999 | ARPC4 | -0,409 | 0,594 |
| O70456 | 1433S | -0,205 | 0,595 |
| Q8QZR3 | EST2A | -0,572 | 0,606 |
| Q8BND5 | QSOX1 | -0,424 | 0,606 |
| Q9DBJ1 | PGAM1 | 0,161  | 0,606 |
| Q9JMH6 | TRXR1 | 0,237  | 0,606 |
| O55234 | PSB5  | 0,578  | 0,611 |
| O55111 | DSG2  | 0,462  | 0,621 |
| P10639 | THIO  | 0,185  | 0,623 |
| O08807 | PRDX4 | 0,192  | 0,623 |
| P42125 | ECI1  | 0,247  | 0,623 |
| P30681 | HMGB2 | -0,242 | 0,628 |
| Q8BHN3 | GANAB | 0,203  | 0,637 |
| Q60854 | SPB6  | 0,541  | 0,645 |
| P68254 | 1433T | -0,446 | 0,654 |
| P70195 | PSB7  | 0,368  | 0,669 |
| Q01768 | NDKB  | 0,207  | 0,673 |
| P63101 | 1433Z | -0,161 | 0,682 |
| P31786 | ACBP  | 0,157  | 0,682 |
| Q8BG05 | ROA3  | 0,206  | 0,686 |
| Q8VC28 | AK1CD | -0,196 | 0,687 |

|        |       |        |       |
|--------|-------|--------|-------|
| Q9R1P4 | PSA1  | 0,178  | 0,700 |
| Q9Z0L8 | GGH   | 0,173  | 0,702 |
| Q9JKF1 | IQGA1 | -0,268 | 0,703 |
| Q9DCV7 | K2C7  | 0,192  | 0,703 |
| P47968 | RPIA  | 0,218  | 0,703 |
| Q3V0K9 | PLSI  | 0,319  | 0,703 |
| Q91YI0 | ARLY  | 0,159  | 0,704 |
| P48756 | GIP   | -0,200 | 0,704 |
| P57780 | ACTN4 | 0,120  | 0,704 |
| P61089 | UBE2N | -0,255 | 0,708 |
| Q8CHP8 | PGP   | 0,174  | 0,708 |
| Q9D0F9 | PGM1  | 0,304  | 0,757 |
| Q3URE1 | ACSF3 | -0,203 | 0,758 |
| Q9QUR6 | PPCE  | 0,163  | 0,761 |
| Q9CPU0 | LGUL  | -0,199 | 0,773 |
| Q61598 | GDIB  | 0,086  | 0,782 |
| Q99JW5 | EPCAM | -0,143 | 0,783 |
| Q9Z2X1 | HNRPF | -0,254 | 0,788 |
| Q99020 | ROAA  | 0,546  | 0,788 |
| Q99104 | MYO5A | -0,080 | 0,790 |
| P09103 | PDIA1 | -0,088 | 0,806 |
| Q9EPL2 | CSTN1 | -0,187 | 0,812 |
| P29758 | OAT   | 0,078  | 0,812 |
| Q91ZJ5 | UGPA  | 0,080  | 0,812 |
| Q9EQU5 | SET   | -0,117 | 0,839 |
| Q91WL0 | ES8L3 | 0,089  | 0,839 |
| O88844 | IDHC  | -0,063 | 0,845 |
| P47791 | GSHR  | -0,176 | 0,849 |
| Q9CQA3 | SDHB  | -0,156 | 0,849 |
| P19001 | K1C19 | 0,080  | 0,849 |
| P06151 | LDHA  | 0,059  | 0,859 |
| Q9CPT4 | MYDGF | 0,167  | 0,859 |
| P06801 | MAOX  | 0,291  | 0,859 |
| Q05816 | FABP5 | -0,116 | 0,868 |
| Q62261 | SPTB2 | -0,087 | 0,868 |
| P21460 | CYTC  | 0,063  | 0,892 |
| Q01853 | TERA  | 0,098  | 0,892 |
| Q9D819 | IPYR  | 0,107  | 0,892 |
| Q8VDD5 | MYH9  | -0,089 | 0,896 |
| P07901 | HS90A | -0,117 | 0,897 |
| Q7TPH6 | MYCB2 | -0,094 | 0,897 |
| P61458 | PHS   | 0,064  | 0,904 |

|        |       |        |       |
|--------|-------|--------|-------|
| O35490 | BHMT1 | -0,078 | 0,915 |
| O88531 | PPT1  | -0,085 | 0,916 |
| P53810 | PIPNA | 0,118  | 0,916 |
| Q9JM76 | ARPC3 | -0,050 | 0,916 |
| Q64433 | CH10  | -0,058 | 0,921 |
| P11679 | K2C8  | -0,033 | 0,922 |
| P14211 | CALR  | 0,034  | 0,922 |
| Q8BWT1 | THIM  | -0,052 | 0,925 |
| P26369 | U2AF2 | 0,122  | 0,925 |
| Q62165 | DAG1  | -0,071 | 0,939 |
| Q99K10 | ACON  | -0,029 | 0,951 |
| P26443 | DHE3  | 0,023  | 0,951 |
| P70296 | PEBP1 | 0,035  | 0,951 |
| O35639 | ANXA3 | 0,052  | 0,951 |
| P97466 | NOGG  | 0,064  | 0,951 |
| P47757 | CAPZB | -0,047 | 0,954 |
| Q8R180 | ERO1A | -0,036 | 0,960 |
| Q03265 | ATPA  | -0,054 | 0,960 |
| Q5SV42 | ILEUC | 0,020  | 0,960 |
| P48678 | LMNA  | -0,025 | 0,963 |
| Q93092 | TALDO | 0,023  | 0,981 |
| E9PZQ0 | RYR1  | -0,020 | 0,985 |
| Q6ZQ06 | CE162 | -0,012 | 0,993 |
| P62259 | 1433E | -0,004 | 0,993 |
| P08249 | MDHM  | -0,004 | 0,993 |
| P30416 | FKBP4 | -0,004 | 0,993 |

| MDP-treated organoids (Control vs Math1Δint) |              |                |              |
|----------------------------------------------|--------------|----------------|--------------|
| Protein_ID                                   | Protein name | log2FoldChange | Adj. p-value |
| P17563                                       | SBP1         | -2,296         | 0,000        |
| Q8R010                                       | ACE2         | 3,056          | 0,000        |
| P43137                                       | LIT1         | 4,233          | 0,001        |
| Q9QXD6                                       | F16P1        | 4,461          | 0,002        |
| P12023                                       | A4           | -2,370         | 0,003        |
| Q06890                                       | CLUS         | -1,944         | 0,003        |
| P09411                                       | PGK1         | -1,626         | 0,003        |
| P17897                                       | LYZ1         | -1,413         | 0,003        |
| Q8BND5                                       | QSOX1        | -2,224         | 0,004        |
| P62806                                       | H4           | -1,648         | 0,004        |
| P97449                                       | AMPN         | 1,332          | 0,004        |
| P16406                                       | AMPE         | 1,412          | 0,004        |



|        |       |        |       |
|--------|-------|--------|-------|
| O09051 | GUC2B | 2,730  | 0,004 |
| Q60997 | DMBT1 | 1,299  | 0,004 |
| P11499 | HS90B | -1,494 | 0,004 |
| Q8R180 | ERO1A | -1,630 | 0,004 |
| P12710 | FABPL | 1,034  | 0,005 |
| O88968 | TCO2  | 1,307  | 0,005 |
| P13707 | GPDA  | 1,379  | 0,007 |
| P52480 | KPYM  | -1,137 | 0,009 |
| P06728 | APOA4 | 1,037  | 0,009 |
| P84244 | H33   | -1,582 | 0,012 |
| P10493 | NID1  | -1,306 | 0,012 |
| P02469 | LAMB1 | -1,225 | 0,012 |
| P17742 | PPIA  | -1,075 | 0,012 |
| P40142 | TKT   | -1,058 | 0,012 |
| Q60605 | MYL6  | 1,218  | 0,012 |
| P02468 | LAMC1 | -1,250 | 0,012 |
| P09803 | CADH1 | -0,932 | 0,012 |
| O08585 | CLCA  | 1,516  | 0,012 |
| O55111 | DSG2  | -1,509 | 0,013 |
| P09405 | NUCL  | -1,017 | 0,014 |
| P06745 | G6PI  | -1,013 | 0,014 |
| P05064 | ALDOA | -0,955 | 0,014 |
| Q93092 | TALDO | -0,908 | 0,014 |
| P19137 | LAMA1 | -1,345 | 0,015 |
| Q99020 | ROAA  | -3,222 | 0,015 |
| Q9EPL2 | CSTN1 | -1,531 | 0,015 |
| O88342 | WDR1  | -0,925 | 0,015 |
| Q8K0C9 | GMDS  | -0,897 | 0,015 |
| P58044 | IDI1  | -1,597 | 0,016 |
| Q8K354 | CBR3  | 1,836  | 0,017 |
| Q920E5 | FPPS  | -1,216 | 0,017 |
| P84089 | ERH   | -1,262 | 0,018 |
| Q0VG18 | SIM24 | 2,409  | 0,018 |
| P24822 | PPBI  | 1,363  | 0,019 |
| Q9R100 | CAD17 | -0,970 | 0,020 |
| Q00623 | APOA1 | 1,257  | 0,020 |
| Q99JG3 | ANX13 | 0,973  | 0,020 |
| Q99KP3 | CRYL1 | 0,990  | 0,021 |
| Q8CGP6 | H2A1H | -0,851 | 0,022 |
| E9PZQ0 | RYS1  | 0,752  | 0,025 |
| Q8BK48 | EST2E | 0,774  | 0,028 |
| P68373 | TBA1C | -1,794 | 0,029 |

|        |       |        |       |
|--------|-------|--------|-------|
| P62962 | PROF1 | -0,688 | 0,029 |
| P50247 | SAHH  | -0,673 | 0,029 |
| Q8C196 | CPSM  | -0,722 | 0,032 |
| P06151 | LDHA  | -0,817 | 0,033 |
| O88310 | ITL1A | 1,311  | 0,033 |
| P68037 | UB2L3 | -0,875 | 0,035 |
| Q9DBJ1 | PGAM1 | -0,713 | 0,035 |
| P70168 | IMB1  | -1,085 | 0,035 |
| Q8CAQ8 | MIC60 | 1,023  | 0,037 |
| P56395 | CYB5  | 1,456  | 0,037 |
| Q05793 | PGBM  | -0,678 | 0,037 |
| P17751 | TPIS  | -0,812 | 0,038 |
| P58252 | EF2   | -0,734 | 0,038 |
| Q9D8I3 | GLOD5 | 1,338  | 0,038 |
| Q80X90 | FLNB  | -0,846 | 0,040 |
| P29758 | OAT   | -0,770 | 0,040 |
| P21460 | CYTC  | -0,577 | 0,040 |
| Q8R1G2 | CMBL  | 0,887  | 0,040 |
| Q61598 | GDIB  | -0,626 | 0,044 |
| P19467 | MUC13 | 0,638  | 0,044 |
| P62858 | RS28  | -1,334 | 0,044 |
| Q9QUR6 | PPCE  | -1,747 | 0,045 |
| P17182 | ENOA  | -0,727 | 0,053 |
| P70296 | PEBP1 | -0,665 | 0,053 |
| P16110 | LEG3  | -1,081 | 0,061 |
| Q99KI0 | ACON  | -0,855 | 0,062 |
| Q8VCN5 | CGL   | 1,113  | 0,065 |
| P63017 | HSP7C | -0,612 | 0,070 |
| Q9WVA4 | TAGL2 | -0,492 | 0,077 |
| P34884 | MIF   | -0,831 | 0,078 |
| Q03265 | ATPA  | 0,890  | 0,078 |
| Q64133 | AOFA  | 0,951  | 0,078 |
| P53810 | PIPNA | 1,008  | 0,080 |
| P10649 | GSTM1 | -0,567 | 0,082 |
| Q61171 | PRDX2 | -0,566 | 0,082 |
| O35658 | C1QBP | 0,678  | 0,085 |
| Q9D154 | ILEUA | 0,583  | 0,086 |
| Q08652 | RET2  | 1,334  | 0,086 |
| O88844 | IDHC  | -0,517 | 0,092 |
| P97371 | PSME1 | 0,633  | 0,097 |
| Q9CZU6 | CISY  | -0,712 | 0,097 |
| Q8C115 | PKHH2 | -0,509 | 0,105 |

|        |       |        |       |
|--------|-------|--------|-------|
| Q9JKF1 | IQGA1 | -0,945 | 0,107 |
| A2ASS6 | TITIN | 1,202  | 0,107 |
| Q64433 | CH10  | -0,457 | 0,111 |
| Q02819 | NUCB1 | 0,574  | 0,111 |
| O08709 | PRDX6 | -0,436 | 0,111 |
| Q91WL0 | ES8L3 | 0,963  | 0,113 |
| Q08879 | FBLN1 | -0,560 | 0,113 |
| Q9CQA3 | SDHB  | 0,784  | 0,113 |
| Q9QXT0 | CNPY2 | 1,036  | 0,121 |
| P61458 | PHS   | -0,825 | 0,121 |
| P54071 | IDHP  | -0,977 | 0,129 |
| Q9JM76 | ARPC3 | 0,901  | 0,136 |
| P23492 | PNPH  | 0,688  | 0,142 |
| Q9EQF5 | DPYS  | -0,682 | 0,144 |
| Q01768 | NDKB  | -0,659 | 0,145 |
| Q9D1A2 | CNDP2 | 1,891  | 0,145 |
| Q8VC30 | TKFC  | -1,118 | 0,148 |
| Q8BWT1 | THIM  | -0,760 | 0,153 |
| P18760 | COF1  | -0,384 | 0,154 |
| P05202 | AATM  | -0,808 | 0,155 |
| Q8K0C5 | ZG16  | 0,592  | 0,157 |
| Q4KML4 | ABRAL | -0,746 | 0,157 |
| P21107 | TPM3  | 0,791  | 0,163 |
| P14152 | MDHC  | -0,378 | 0,165 |
| Q9D8N0 | EF1G  | -0,653 | 0,169 |
| P23198 | CBX3  | -1,345 | 0,169 |
| Q9EQK5 | MVP   | 0,950  | 0,171 |
| P38647 | GRP75 | -0,405 | 0,174 |
| Q9WUM4 | COR1C | -1,256 | 0,178 |
| Q9R0P3 | ESTD  | -0,811 | 0,178 |
| P01898 | HA10  | -0,805 | 0,180 |
| P99026 | PSB4  | -0,436 | 0,182 |
| P70441 | NHRF1 | 0,445  | 0,191 |
| P47738 | ALDH2 | -0,619 | 0,200 |
| Q9R1P1 | PSB3  | 0,695  | 0,200 |
| Q9D6J6 | NDUV2 | 0,997  | 0,200 |
| Q60854 | SPB6  | 0,897  | 0,216 |
| Q91Y97 | ALDOB | 0,445  | 0,219 |
| Q9JLJ2 | AL9A1 | -0,500 | 0,229 |
| Q91YR9 | PTGR1 | 0,897  | 0,233 |
| Q9CQI6 | COTL1 | -0,683 | 0,237 |
| Q02257 | PLAK  | 0,927  | 0,237 |

|        |       |        |       |
|--------|-------|--------|-------|
| Q9DCD0 | 6PGD  | -0,948 | 0,244 |
| Q62468 | VILI  | -0,746 | 0,244 |
| P08228 | SODC  | -0,442 | 0,244 |
| P27773 | PDIA3 | -0,364 | 0,244 |
| E9Q557 | DESP  | 0,607  | 0,244 |
| P63101 | 1433Z | -0,329 | 0,250 |
| Q91WG0 | EST2C | 0,673  | 0,254 |
| Q6Q473 | CLA4A | 0,387  | 0,254 |
| Q9QUM9 | PSA6  | 0,817  | 0,256 |
| Q6URW6 | MYH14 | 0,523  | 0,266 |
| Q91WU0 | CES1F | 0,709  | 0,266 |
| Q9R1P3 | PSB2  | 0,900  | 0,270 |
| E9PV24 | FIBA  | -0,781 | 0,276 |
| P48678 | LMNA  | 0,539  | 0,277 |
| Q8K0E8 | FIBB  | -0,875 | 0,286 |
| P09671 | SODM  | 0,510  | 0,288 |
| P31786 | ACBP  | -0,303 | 0,289 |
| Q99PT1 | GDIR1 | 0,725  | 0,295 |
| Q8BH95 | ECHM  | -0,845 | 0,297 |
| Q9Z2U0 | PSA7  | 0,355  | 0,301 |
| P47754 | CAZA2 | -0,810 | 0,301 |
| Q8BHN3 | GANAB | -0,826 | 0,305 |
| P07901 | HS90A | -0,646 | 0,305 |
| P24270 | CATA  | -0,424 | 0,305 |
| P99029 | PRDX5 | -0,366 | 0,314 |
| Q62261 | SPTB2 | -0,362 | 0,317 |
| Q9D819 | IPYR  | -0,421 | 0,320 |
| P07356 | ANXA2 | -0,356 | 0,324 |
| O35945 | AL1A7 | -0,628 | 0,325 |
| Q9Z2X1 | HNRPF | -0,763 | 0,326 |
| P20029 | GRP78 | -0,274 | 0,326 |
| P08249 | MDHM  | -0,416 | 0,330 |
| P10126 | EF1A1 | -0,312 | 0,333 |
| O88312 | AGR2  | -0,266 | 0,341 |
| P00329 | ADH1  | 0,346  | 0,341 |
| Q91ZJ5 | UGPA  | 0,371  | 0,341 |
| P62827 | RAN   | 0,419  | 0,341 |
| Q9R1P4 | PSA1  | 0,446  | 0,341 |
| P60843 | IF4A1 | 0,828  | 0,341 |
| P32020 | NLTP  | 1,001  | 0,341 |
| P97466 | NOGG  | -0,369 | 0,345 |
| Q80XD8 | PRAP1 | 0,262  | 0,360 |

|        |       |        |       |
|--------|-------|--------|-------|
| P36552 | HEM6  | -0,776 | 0,362 |
| Q99LX0 | PARK7 | -0,500 | 0,362 |
| P63260 | ACTG  | -0,310 | 0,363 |
| P99027 | RLA2  | -0,373 | 0,364 |
| Q11136 | PEPD  | -1,296 | 0,379 |
| P59999 | ARPC4 | -0,600 | 0,379 |
| Q9CQV8 | 1433B | 0,322  | 0,379 |
| Q6P069 | SORCN | 0,328  | 0,379 |
| P68134 | ACTS  | 0,413  | 0,379 |
| O08807 | PRDX4 | 0,303  | 0,380 |
| P08122 | CO4A2 | 0,550  | 0,383 |
| P24527 | LKHA4 | -0,649 | 0,392 |
| Q8CHP8 | PGP   | -0,257 | 0,414 |
| P24549 | AL1A1 | 0,244  | 0,438 |
| P19157 | GSTP1 | -0,243 | 0,443 |
| P26369 | U2AF2 | -0,960 | 0,444 |
| P05063 | ALDOC | -0,553 | 0,444 |
| Q9R0P5 | DEST  | -0,275 | 0,444 |
| P10518 | HEM2  | 0,657  | 0,444 |
| P57780 | ACTN4 | -0,229 | 0,457 |
| Q9CZ44 | NSF1C | -0,497 | 0,470 |
| Q9WV55 | VAPA  | -0,367 | 0,470 |
| P09103 | PDIA1 | -0,219 | 0,470 |
| Q6ZQ06 | CE162 | 2,402  | 0,470 |
| P99024 | TBB5  | -0,481 | 0,471 |
| Q9JKR6 | HYOU1 | -0,365 | 0,473 |
| Q8VC28 | AK1CD | -0,197 | 0,473 |
| P63038 | CH60  | 0,266  | 0,473 |
| Q7TPR4 | ACTN1 | 1,963  | 0,482 |
| Q9R1P0 | PSA4  | -0,431 | 0,487 |
| Q91YI0 | ARLY  | -0,601 | 0,492 |
| P05201 | AATC  | -0,607 | 0,497 |
| Q8BG05 | ROA3  | 0,424  | 0,497 |
| Q5SV42 | ILEUC | -0,271 | 0,497 |
| P14869 | RLA0  | -0,227 | 0,497 |
| Q8VCM7 | FIBG  | -0,541 | 0,510 |
| P15864 | H12   | -0,601 | 0,511 |
| Q8K157 | GALM  | 0,449  | 0,519 |
| P39061 | COIA1 | 0,450  | 0,519 |
| Q9CQW5 | LEG2  | 0,272  | 0,522 |
| P27467 | WNT3A | 0,368  | 0,522 |
| P30681 | HMGB2 | 0,374  | 0,522 |

|        |       |        |       |
|--------|-------|--------|-------|
| P48758 | CBR1  | 0,190  | 0,525 |
| Q9Z0S1 | BPNT1 | 0,293  | 0,528 |
| P35979 | RL12  | -0,423 | 0,533 |
| P10639 | THIO  | -0,190 | 0,544 |
| P48756 | GIP   | 0,341  | 0,544 |
| P06801 | MAOX  | 0,659  | 0,553 |
| P51855 | GSHB  | -0,482 | 0,561 |
| Q9JMH6 | TRXR1 | -0,195 | 0,561 |
| P30275 | KCRU  | 0,449  | 0,562 |
| P97816 | S100G | -0,383 | 0,572 |
| O35639 | ANXA3 | -0,269 | 0,579 |
| P63242 | IF5A1 | -0,372 | 0,584 |
| Q07797 | LG3BP | 0,145  | 0,584 |
| Q01853 | TERA  | 0,315  | 0,584 |
| P26443 | DHE3  | -0,175 | 0,585 |
| Q61937 | NPM   | -0,151 | 0,585 |
| Q8QZR3 | EST2A | 0,516  | 0,585 |
| O09131 | GSTO1 | 0,462  | 0,585 |
| O35490 | BHMT1 | -0,386 | 0,590 |
| Q9EQU5 | SET   | -0,275 | 0,590 |
| P49312 | ROA1  | -0,253 | 0,590 |
| Q91X72 | HEMO  | -0,188 | 0,590 |
| Q9D312 | K1C20 | 0,259  | 0,590 |
| P70195 | PSB7  | 0,288  | 0,590 |
| Q91V76 | CK054 | 0,559  | 0,590 |
| Q9QYX7 | PCLO  | -1,490 | 0,603 |
| P40124 | CAP1  | 0,322  | 0,616 |
| O89079 | COPE  | -0,155 | 0,621 |
| P24472 | GSTA4 | -0,228 | 0,625 |
| Q62433 | NDRG1 | -0,314 | 0,629 |
| Q3URE1 | ACSF3 | -0,250 | 0,632 |
| P62259 | 1433E | -0,138 | 0,632 |
| Q61508 | ECM1  | 0,140  | 0,632 |
| Q8K2B3 | SDHA  | -0,566 | 0,644 |
| P97807 | FUMH  | -0,367 | 0,660 |
| O35459 | ECH1  | 0,272  | 0,671 |
| O08749 | DLDH  | 0,226  | 0,675 |
| O88569 | ROA2  | -0,140 | 0,675 |
| P55292 | DSC2  | -0,331 | 0,677 |
| P24369 | PPIB  | -0,155 | 0,686 |
| P68254 | 1433T | 0,242  | 0,687 |
| P16014 | SCG1  | 0,214  | 0,717 |

|        |       |        |       |
|--------|-------|--------|-------|
| P56480 | ATPB  | -0,136 | 0,719 |
| P35700 | PRDX1 | -0,132 | 0,719 |
| P68510 | 1433F | 0,127  | 0,747 |
| Q3V0K9 | PLSI  | 0,209  | 0,747 |
| Q61792 | LASP1 | -0,254 | 0,762 |
| O70475 | UGDH  | -0,280 | 0,766 |
| P00493 | HPRT  | -0,356 | 0,768 |
| O70456 | 1433S | -0,129 | 0,772 |
| Q8VDD5 | MYH9  | 0,112  | 0,807 |
| P01887 | B2MG  | 0,159  | 0,807 |
| Q9CPT4 | MYDGF | -0,102 | 0,824 |
| Q9Z0L8 | GGH   | -0,087 | 0,824 |
| P08113 | ENPL  | 0,072  | 0,824 |
| Q9R0H0 | ACOX1 | 0,244  | 0,826 |
| Q3UZZ4 | OLFM4 | -0,066 | 0,837 |
| P47791 | GSHR  | 0,184  | 0,837 |
| O35685 | NUDC  | 0,396  | 0,837 |
| Q9CPU0 | LGUL  | 0,103  | 0,840 |
| Q60864 | STIP1 | -0,102 | 0,841 |
| Q62165 | DAG1  | -0,101 | 0,841 |
| O70435 | PSA3  | 0,093  | 0,866 |
| Q8VDN2 | AT1A1 | 0,091  | 0,877 |
| P14211 | CALR  | 0,058  | 0,877 |
| P16858 | G3P   | -0,074 | 0,893 |
| P47757 | CAPZB | -0,068 | 0,895 |
| P97429 | ANXA4 | -0,053 | 0,895 |
| P30416 | FKBP4 | 0,080  | 0,895 |
| Q60692 | PSB6  | 0,104  | 0,895 |
| Q9Z2U1 | PSA5  | 0,060  | 0,902 |
| Q8R0F8 | FAHD1 | 0,254  | 0,904 |
| P20108 | PRDX3 | 0,045  | 0,907 |
| Q99104 | MYO5A | 0,050  | 0,907 |
| Q99JW5 | EPCAM | 0,096  | 0,913 |
| Q04447 | KCRB  | -0,055 | 0,923 |
| Q9EPB4 | ASC   | 0,056  | 0,923 |
| P19639 | GSTM4 | 0,104  | 0,923 |
| Q62393 | TPD52 | 0,148  | 0,923 |
| P11725 | OTC   | -0,046 | 0,931 |
| P13745 | GSTA1 | -0,030 | 0,931 |
| Q80W65 | PCSK9 | 0,057  | 0,931 |
| P68372 | TBB4B | -0,059 | 0,932 |
| P61089 | UBE2N | -0,055 | 0,932 |

|        |       |        |       |
|--------|-------|--------|-------|
| Q9WTP6 | KAD2  | -0,040 | 0,932 |
| Q7TPH6 | MYCB2 | -0,051 | 0,934 |
| P49722 | PSA2  | -0,046 | 0,934 |
| P09528 | FRIH  | -0,036 | 0,934 |
| P42125 | ECI1  | 0,033  | 0,934 |
| P19001 | K1C19 | 0,038  | 0,934 |
| Q61425 | HCDH  | 0,046  | 0,934 |
| Q64442 | DHSO  | 0,066  | 0,934 |
| O70570 | PIGR  | -0,024 | 0,937 |
| P16546 | SPTN1 | -0,074 | 0,951 |
| P10605 | CATB  | -0,043 | 0,951 |
| Q8K419 | LEG4  | 0,018  | 0,951 |
| O88322 | NID2  | 0,076  | 0,951 |
| P47968 | RPIA  | 0,034  | 0,957 |
| Q9DCV7 | K2C7  | -0,024 | 0,959 |
| P15626 | GSTM2 | -0,030 | 0,970 |
| Q05816 | FABP5 | -0,023 | 0,970 |
| Q6ZWM4 | LSM8  | -0,021 | 0,970 |
| Q64727 | VINC  | -0,018 | 0,977 |
| O88531 | PPT1  | 0,019  | 0,979 |
| P11679 | K2C8  | -0,007 | 0,981 |
| P26040 | EZRI  | -0,007 | 0,985 |
| P05784 | K1C18 | -0,002 | 0,993 |
| P55050 | FABPI | -0,001 | 0,997 |
